# Supplementary material for: Hereditary Gastric Cancer: Single-Gene or Multigene Panel Testing? A Mono-Institutional Experience
Source: MDPI journal article supplement (doi:10.3390/genes14051077), 2023-05-13
Supplement: s1 [file s1]

**Table S3.** Detailed genetic testing results from both SGT and MGPT.

| ID | SGT gene/genes analysed              | SGT Type | SGT RESULTS | MGPT | MGPT RESULTS | PV Details                       | VUS Details                                                                                                                |
|----|--------------------------------------|----------|-------------|------|--------------|----------------------------------|----------------------------------------------------------------------------------------------------------------------------|
| 1  | CDH1                                 | UNK      | N           | no   | n.a.         |                                  |                                                                                                                            |
| 2  | MSH2                                 | FAM      | P           | no   | n.a.         | MSH2: c.1216C>T (p.Arg406Ter)    |                                                                                                                            |
| 3  | CDH1, MLH1, MSH2, MSH6, PMS2, EPCAM* | UNK      | N           | yes  | U            |                                  | RAD50: c.3036+5G>A (p.?)                                                                                                   |
| 4  | CDH1                                 | UNK      | N           | yes  | N            |                                  |                                                                                                                            |
| 5  | CDH1, MLH1, MSH2, MSH6, PMS2, EPCAM* | UNK      | N           | yes  | U            |                                  | BRCA1: c.547+14del (p.?)                                                                                                   |
| 6  | BRCA1, BRCA2                         | UNK      | N           | yes  | N            |                                  |                                                                                                                            |
| 7  | BRCA1, BRCA2                         | UNK      | P           | no   | n.a.         | BRCA2: c.8633-1G>A (p.?)         |                                                                                                                            |
| 8  | CDH1                                 | KNOWN**  | N           | no   | n.a.         |                                  |                                                                                                                            |
| 9  | CDH1, MLH1, MSH2, MSH6, PMS2, EPCAM* | UNK      | N           | yes  | N            |                                  |                                                                                                                            |
| 10 | CDH1                                 | UNK      | N           | yes  | N            |                                  |                                                                                                                            |
| 11 | CDH1, BRCA1, BRCA2                   | UNK      | N           | yes  | N            |                                  |                                                                                                                            |
| 12 | CDH1, MLH1, MSH2, MSH6, PMS2, EPCAM* | UNK      | N           | yes  | N            |                                  |                                                                                                                            |
| 13 | CDH1                                 | UNK      | N           | yes  | P            | RAD51D: c.1A>G (p.Met1Val)       | RAD51D: c.907A>G (p.Thr303Ala)                                                                                             |
| 14 | CDH1, MLH1, MSH2, MSH6, PMS2, EPCAM* | UNK      | N           | yes  | N            |                                  |                                                                                                                            |
| 15 | CDH1, MLH1, PMS2                     | UNK      | N           | yes  | N            |                                  |                                                                                                                            |
| 16 | CDH1                                 | UNK      | N           | yes  | U            |                                  | BRCA2: c.5492T>C (p.Ile1831Thr)                                                                                            |
| 17 | CDH1                                 | UNK      | N           | yes  | N            |                                  |                                                                                                                            |
| 18 | CDH1                                 | UNK      | N           | yes  | N            |                                  |                                                                                                                            |
| 19 | CDH1                                 | UNK      | N           | yes  | N            |                                  |                                                                                                                            |
| 20 | CDH1                                 | UNK      | N           | yes  | N            |                                  |                                                                                                                            |
| 21 | CDH1                                 | UNK      | N           | no   | n.a.         |                                  |                                                                                                                            |
| 22 | CDH1                                 | UNK      | N           | yes  | N            |                                  |                                                                                                                            |
| 23 | MSH2, MSH6, EPCAM*                   | UNK      | P           | yes  | P            | MSH2: c.339_340del (p.Asn115Ter) |                                                                                                                            |
| 24 | BRCA1, BRCA2                         | UNK      | P           | no   | n.a.         | BRCA1: c.5278-2A>T (p.?)         |                                                                                                                            |
| 25 | CDH1                                 | UNK      | N           | yes  | U            |                                  | RAD50: c.980G>A (p.Arg327His)                                                                                              |
| 26 | CDH1                                 | UNK      | N           | yes  | U            |                                  | ATM: c.1898+3A>G (p.?)<br>APC: c.6019T>C (p.Tyr2007His)<br>MUTYH: c.925C>T (p.Arg309Cys)<br>MUTYH: c.1276C>T (p.Arg426Cys) |
| 27 | CDH1                                 | UNK      | N           | yes  | U            |                                  | STK11: c.1211C>T (p.Ser404Phe)                                                                                             |
| 28 | CDH1                                 | UNK      | N           | yes  | N            |                                  |                                                                                                                            |
| 29 | CDH1                                 | UNK      | N           | yes  | U            |                                  | APC: c.2584A>G (p.Asn862Asp)<br>MUTYH: c.1276C>T (p.Arg426Cys)                                                             |

|    |                                                    |     |   |     |      |                                                                                           |
|----|----------------------------------------------------|-----|---|-----|------|-------------------------------------------------------------------------------------------|
| 30 | MSH2, MSH6, EPCAM*                                 | UNK | N | yes | N    |                                                                                           |
| 31 | CDH1                                               | UNK | N | yes | U    | RAD50: c.3480T>G (p.Ile1160Met)<br>BARD1: c.2251C>T (p.Arg751Trp)                         |
| 32 | BRCA1, BRCA2                                       | UNK | N | no  | n.a. |                                                                                           |
| 33 | CDH1                                               | UNK | N | yes | U    | PALB2: c.1784A>C (p.Asp595Ala)                                                            |
| 34 | CDH1                                               | UNK | N | no  | n.a. |                                                                                           |
| 35 | CDH1, BRCA1, BRCA2                                 | UNK | U | yes | U    | BRCA2: c.796T>G (p.Phe266Val)<br>BRCA2: c.475+11A>C (p.?)<br>ATM: c.1790C>T (p.Pro597Leu) |
| 36 | CDH1                                               | UNK | N | yes | U    | MUTYH: c.667A>G (p.Ile223Val)                                                             |
| 37 | CDH1                                               | UNK | N | no  | n.a. |                                                                                           |
| 38 | CDH1                                               | UNK | P | no  | n.a. | CDH1: c.1792C>T (p.Arg598Ter)                                                             |
| 39 | CDH1, MLH1, MSH2, MSH6, PMS2, EPCAM*               | UNK | N | yes | N    |                                                                                           |
| 40 | CDH1, BRCA1, BRCA2                                 | UNK | P | no  | n.a. | CDH1: c.833-476_1138-464del (p.Gly278ValfsTer7)                                           |
| 41 | CDH1                                               | UNK | N | no  | n.a. |                                                                                           |
| 42 | MLH1, MSH2, MSH6, PMS2, EPCAM*                     | UNK | N | yes | P    | ATM: c.2413C>T (p.Arg805Ter)                                                              |
| 43 | CDH1                                               | UNK | N | no  | n.a. |                                                                                           |
| 44 | CDH1                                               | UNK | N | yes | U    | MUTYH: c.56G>A (p.Arg19Gln)                                                               |
| 45 | BRCA1                                              | FAM | N | no  | n.a. |                                                                                           |
| 46 | CDH1                                               | UNK | N | no  | n.a. |                                                                                           |
| 47 | CDH1                                               | UNK | N | yes | N    |                                                                                           |
| 48 | BRCA2                                              | FAM | P | no  | n.a. | BRCA2: c.67+1G>A (p.?)                                                                    |
| 49 | CDH1, BRCA1, BRCA2, MLH1, MSH2, MSH6, PMS2, EPCAM* | UNK | P | yes | P    | BRCA2: c.67+1G>A (p.?)<br>ATM: c.5890A>G (p.Lys1964Glu)                                   |
| 50 | CDH1                                               | UNK | N | yes | N    |                                                                                           |
| 51 | CDH1                                               | UNK | N | no  | n.a. |                                                                                           |
| 52 | CDH1                                               | UNK | N | yes | U    | MLH1: c.283T>G (p.Ser95Ala)<br>NBN: c.1079C>A (p.Thr360Asn)                               |
| 53 | CDH1                                               | UNK | P | yes | P    | CDH1: c.2416G>T (p.Glu806Ter)                                                             |
| 54 | CDH1, BRCA1, BRCA2, MLH1, MSH2, MSH6, PMS2, EPCAM* | UNK | N | yes | N    |                                                                                           |

SGT Single-Gene Testing, MGPT Multigene Panel Testing, PV Pathogenic Variant (including C4 and C5), VUS Variant of Unknown Significance, HDGC Hereditary Diffuse Gastric Cancer, FIGC Familial Intestinal Gastric Cancer, HBOC Hereditary Breast Ovarian Cancer, UNK search of unknown mutations, FAM search for the familial mutation, P positive, N normal, U uncertain, \* search only for large rearrangements, \*\* search for the mutation previously identified in the tumor sample, n.a. not applicable

Reference sequences (Human Feb. 2009 - GRCh37/hg19 Assembly): *APC* NM\_000038.6; *ATM* NM\_000051.4; *BARD1* NM\_000465.4; *BRCA1* NM\_007294.4; *BRCA2* NM\_000059.4; *CDH1* NM\_004360.5; *MLH1* NM\_000249.4; *MSH2* NM\_000251.3; *MUTYH* NM\_001128425.2; *NBN* NM\_002485.5; *PALB2* NM\_024675.4; *RAD50* NM\_005732.4; *RAD51D* NM\_002878.4; *STK11* NM\_000455.5
