# Supplementary material for: Hereditary Gastric Cancer: Single-Gene or Multigene Panel Testing? A Mono-Institutional Experience
Source: MDPI journal article supplement (doi:10.3390/genes14051077), 2023-05-13
Supplement: s1 [file s1]

**Table S1.** List of genes included in the panel used for the present study.

|              |                |               |               |               |
|--------------|----------------|---------------|---------------|---------------|
| <i>APC</i>   | <i>CDH1</i>    | <i>MLH1</i>   | <i>PALB2</i>  | <i>RAD51C</i> |
| <i>ATM</i>   | <i>CDK4</i>    | <i>MRE11A</i> | <i>PIK3CA</i> | <i>RAD51D</i> |
| <i>BARD1</i> | <i>CDKN2A</i>  | <i>MSH2</i>   | <i>PMS2</i>   | <i>STK11</i>  |
| <i>BRCA1</i> | <i>CHEK2</i>   | <i>MSH6</i>   | <i>PMS2CL</i> | <i>TP53</i>   |
| <i>BRCA2</i> | <i>EPCAM</i>   | <i>MUTYH</i>  | <i>PTEN</i>   | <i>XRCC2</i>  |
| <i>BRIP1</i> | <i>FAM175A</i> | <i>NBN</i>    | <i>RAD50</i>  |               |
