# Supplementary material for: Hereditary Gastric Cancer: Single-Gene or Multigene Panel Testing? A Mono-Institutional Experience
Source: MDPI journal article supplement (doi:10.3390/genes14051077), 2023-05-13
Supplement: s1 [file s1]

**Table S2. Individual clinical features and detailed family history of the 54 GC patients.**

| ID | Sex | Age at diagnosis | Lauren Histology | Anatomic Location | AJCC Prognostic Staging | Other tumor (age at diagnosis) | Relatives with GC (Lauren histology, age at diagnosis) | FH of other cancers (age at diagnosis)*                                                                                            |
|----|-----|------------------|------------------|-------------------|-------------------------|--------------------------------|--------------------------------------------------------|------------------------------------------------------------------------------------------------------------------------------------|
| 1  | F   | 40               | Intestinal       | Unknown           | IVB                     | NSCLC (47)                     | FDR (DGC, 39), TDR (NOS, 78)                           | SDR PC (80)                                                                                                                        |
| 2  | F   | 68               | Intestinal       | Non-Cardia        | I                       | CRC (52), Other (79)           |                                                        | FDR PC (52) and CRC (60), FDR EC (44) and CRC (46), FDR CRC (54), FDR PrC (65), FDR BC (42), FDR CRC (49), SDR CRC (28)            |
| 3  | F   | 45               | Diffuse          | Non-Cardia        | I                       |                                | M.S.: FDR (IGC, 72)                                    | M.S.: SDR PrC (70), SDR liver (58), SDR liver (79); P.S.: SDR OvCa (50), SDR BC (33), SDR bladder (52), SDR HD (48), SDR lung (49) |
| 4  | M   | 45               | Diffuse          | Cardia            | IIA                     |                                | SDR (NOS, 80)                                          | TDR NOS (58)                                                                                                                       |
| 5  | F   | 40               | Diffuse          | Non-Cardia        | I                       |                                | P.S.: SDR (NOS, 79)                                    | M.S.: TDR BC (75)                                                                                                                  |
| 6  | F   | 69               | Diffuse          | Non-Cardia        | I                       | DBC (45), CRC (69)             | SDR (NOS, 42)                                          | FDR BBC (33,33), FDR PC (67), SDR CRC (79), TDR BC (60), TDR CRC (55), TDR CRC (66)                                                |
| 7  | F   | 61               | Diffuse          | Non-Cardia        | III                     | Bilateral DBC (42,52)          |                                                        | M.S.: FDR EC (72), SDR NOS (72) – P.S.: SDR BBC (59, 67), SDR BC (60)                                                              |
| 8  | M   | 56               | Mixed            | Non-Cardia        | III                     |                                |                                                        | FDR liver (68)                                                                                                                     |
| 9  | F   | 36               | Diffuse          | Non-Cardia        | I                       |                                | SDR (NOS, 43), TDR (NOS, 76)                           | SDR BC (45), SDR PrC (81)                                                                                                          |
| 10 | F   | 42               | Diffuse          | Cardia            | III                     |                                |                                                        | FDR kidney (67)                                                                                                                    |
| 11 | F   | 44               | Mixed            | Non-Cardia        | IIB                     | DBC (34,43,47)                 | SDR (NOS, 96)                                          | FDR BC (51), SDR BC (53) and lung (61), SDR PrC (80) and CRC (90)                                                                  |
| 12 | M   | 36               | Unknown          | Cardia            | IV                      | HD (34)                        |                                                        | SDR BC (59), SDR osteosarcoma (72)                                                                                                 |
| 13 | F   | 48               | Diffuse          | Non-Cardia        | I                       |                                | SDR (NOS, 55)                                          | SDR lung (37), SDR BC (56), SDR lung (70), TDR CRC (60)                                                                            |
| 14 | M   | 60               | Intestinal       | Non-Cardia        | IIA                     | T.n. (31), PrC (64), SCC (75)  |                                                        | FDR PC (?), FDR PC (?)                                                                                                             |
| 15 | M   | 50               | Mixed            | Cardia            | III                     |                                | FDR (NOS, 77), SDR (NOS, 75)                           |                                                                                                                                    |
| 16 | F   | 26               | Mixed            | Non-Cardia        | IV                      |                                |                                                        | SDR bladder cancer (84), SDR melanoma (81)                                                                                         |
| 17 | F   | 32               | Unknown          | Non-Cardia        | IV                      |                                |                                                        |                                                                                                                                    |
| 18 | M   | 31               | Diffuse          | Cardia            | III                     |                                |                                                        | FDR bladder carcinoma in situ (19), SDR OvCa (75)                                                                                  |
| 19 | F   | 34               | Diffuse          | Non-Cardia        | IV                      |                                |                                                        |                                                                                                                                    |
| 20 | F   | 35               | Unknown          | Non-Cardia        | IV                      |                                |                                                        |                                                                                                                                    |
| 21 | F   | 54               | Mixed            | Non-Cardia        | I                       |                                | P.S.: FDR (NOS, 64)                                    | M.S.: SDR CRC (70); P.S.: SDR BC (54)                                                                                              |
| 22 | M   | 30               | Diffuse          | Non-Cardia        | 0                       |                                | FDR (NOS, 64), SDR (NOS, 51), TDR (NOS, ?)             |                                                                                                                                    |
| 23 | M   | 59               | Intestinal       | Non-Cardia        | I                       | CRC (43), PrC (56)             | SDR (NOS, 76)                                          | FDR CRC (50), SDR CRC (45)                                                                                                         |
| 24 | F   | 48               | Mixed            | Non-Cardia        | IA                      | DBC (33), TNBC (50)            |                                                        | SDR OvCa (45), SDR OvCa (65), SDR BC (50), TDR BC (31), TDR CRC (41)                                                               |
| 25 | M   | 34               | Diffuse          | Non-Cardia        | I                       |                                |                                                        | SDR PrC (75) and leukemia (75)                                                                                                     |
| 26 | F   | 49               | Diffuse          | Non-Cardia        | I                       |                                | FDR (NOS, 40), FDR (NOS, 40)                           | FDR CRC (52) and urothelial cancer (62), SDR CRC (61)                                                                              |
| 27 | M   | 42               | Diffuse          | Non-Cardia        | IV                      |                                |                                                        | SDR sarcoma (32), SDR lung (52)                                                                                                    |
| 28 | M   | 47               | Diffuse          | Non-Cardia        | I                       |                                |                                                        | FDR lung (67), SDR LBC (67), SDR BC (82), TDR BC (38)                                                                              |
| 29 | F   | 52               | Diffuse          | Cardia            | I                       |                                | FDR (NOS, 53)                                          |                                                                                                                                    |
| 30 | F   | 36               | Mixed            | Non-Cardia        | Unknown                 |                                |                                                        |                                                                                                                                    |
| 31 | M   | 31               | Unknown          | Cardia            | IV                      |                                |                                                        | SDR lung (90)                                                                                                                      |

|     |   |    |            |            |         |                                 |                                                            |                                                                                                                                                                |
|-----|---|----|------------|------------|---------|---------------------------------|------------------------------------------------------------|----------------------------------------------------------------------------------------------------------------------------------------------------------------|
| 32  | F | 55 | Intestinal | Unknown    | IIA     | Bilateral DBC (39,59)           |                                                            | FDR BBC (53, 60), SDR BC (55), SDR thyroid (50)                                                                                                                |
| 33  | F | 42 | Diffuse    | Non-Cardia | IV      |                                 |                                                            | SDR BC (72), SDR GI neoplasia (54)                                                                                                                             |
| 34  | F | 35 | Diffuse    | Unknown    | Unknown |                                 | FDR (DGC, 18)                                              | FDR lymphoma (22)                                                                                                                                              |
| 35  | F | 54 | Diffuse    | Non-Cardia | IIA     | OvCa (55)                       |                                                            | FDR haematological neoplasia (70), SDR gynecological neoplasia (36), TDR BC (35)                                                                               |
| 36  | M | 49 | Diffuse    | Non-Cardia | IV      |                                 | M.S.: FDR (NOS, 72); P.S.: SDR (NOS, 62)                   | M.S.: SDR lymphoma (57), SDR thyroid (80), SDR liver (80). P.S.: FDR lymphoma (49), SDR BC (62)                                                                |
| 37  | F | 42 | Diffuse    | Non-Cardia | I       |                                 | FDR (NOS, 44); SDR (NOS, 48)                               |                                                                                                                                                                |
| 38  | M | 29 | Diffuse    | Non-Cardia | I       |                                 | FDR (DGC, 40), FDR (DGC, 36), FDR (DGC, 16), FDR (DGC, 23) |                                                                                                                                                                |
| 39  | F | 23 | Diffuse    | Non-Cardia | IV      |                                 |                                                            | SDR BC (46) and EC (51), SDR CRC (75)                                                                                                                          |
| 40  | F | 41 | Diffuse    | Non-Cardia | I       | Bilateral LBC (36, 44)          | SDR (NOS, 62)                                              | FDR LBC (45), SDR BC (62)                                                                                                                                      |
| 41  | F | 42 | Diffuse    | Non-Cardia | III     |                                 | SDR (NOS, ?)                                               | FDR lung (64), SDR PC (?)                                                                                                                                      |
| 42  | M | 51 | Unknown    | Non-Cardia | I       | CRC (66), PC (67)               | FDR (NOS, 74)                                              | FDR BC (41), FDR colorectal polyposis                                                                                                                          |
| 43  | F | 41 | Diffuse    | Non-Cardia | IV      |                                 | SDR (NOS, 53)                                              | FDR GIST (59), SDR lung (60)                                                                                                                                   |
| 44  | F | 27 | Diffuse    | Non-Cardia | I       |                                 | SDR (DGC, 41)                                              | FDR DBC (54), SDR BC (70)                                                                                                                                      |
| 45  | F | 43 | Intestinal | Unknown    | Unknown |                                 |                                                            | FDR TNBC (43), FDR BC (53), SDR esophageal neoplasia (?)                                                                                                       |
| 46  | F | 35 | Diffuse    | Non-Cardia | III     |                                 |                                                            | NOS (?)                                                                                                                                                        |
| 47  | F | 71 | Diffuse    | Non-Cardia | III     |                                 | FDR (IGC, 87), SDR (NOS, 55), SDR (NOS, 89)                |                                                                                                                                                                |
| 48  | M | 62 | Intestinal | Unknown    | I       |                                 | FDR/ patient 49 (IGC, 70)                                  | FDR BC (64) and bladder (71) (patient 49), FDR CRC (44), FDR bladder (54), FDR CRC (47), FDR BC (58), FDR CRC (44), SDR BC (35), SDR sarcoma (51), TDR BC (60) |
| 49§ | F | 70 | Intestinal | Non-Cardia | III     | DBC (64), Urotelial cancer (71) | FDR/patient 48 (IGC, 62)                                   | FDR CRC (44), FDR bladder (54), FDR CRC (47), FDR BC (58), FDR CRC (44), SDR BC (35), SDR sarcoma (51), TDR BC (60)                                            |
| 50  | F | 45 | Diffuse    | Non-Cardia | III     |                                 |                                                            |                                                                                                                                                                |
| 51  | F | 45 | Diffuse    | Non-Cardia | I       |                                 |                                                            | SDR CRC (47), SDR lung (56)                                                                                                                                    |
| 52  | F | 36 | Mixed      | Non-Cardia | IIA     |                                 |                                                            | SDR lung (62), SDR NOS (53)                                                                                                                                    |
| 53  | M | 34 | Diffuse    | Non-Cardia | IV      |                                 | SDR (NOS, 62), SDR (NOS, 62)                               | SDR EC (45)                                                                                                                                                    |
| 54  | F | 45 | Diffuse    | Non-Cardia | IV      |                                 |                                                            | Unknown                                                                                                                                                        |

AJCC American Joint Committee on Cancer, BC breast cancer, BBC bilateral breast cancer, CRC colorectal cancer, DBC ductal breast cancer, DGC diffuse gastric cancer, EC endometrial cancer, FH family history, GC gastric cancer, GI gastrointestinal, GIST gastrointestinal stromal tumor, HD Hodgkin disease, H&N head&neck neoplasia, IGC intestinal gastric cancer, LBC lobular breast cancer, NOS not otherwise specified, NSCLC non-small cell lung cancer, OvCa ovarian cancer, PC pancreatic cancer, PrC prostate cancer, SCC squamous cell carcinoma, T.n. testis neoplasia, TNBC triple negative breast

cancer, FDR first-degree relative, SDR second-degree relative, TDR third-degree relative, M.S. maternal side, P.S. paternal side. \*If not otherwise specified, FH has been reported for the most relevant side of the family (paternal or maternal) § proband
